# Supplementary material
Source: PubMed Central journal article supplement (PMC4790817)
Supplement: coxb004746.w1_default.pdf [file coxb004746.w1_default.pdf]

Characteristics of study population, presented as number (%) or as median (10-90th centile).

| Characteristic                        | Value            | Spontaneous delivery | Overall delivery |
|---------------------------------------|------------------|----------------------|------------------|
|                                       |                  | N = 448,520          | N = 606,877      |
| Infant sex                            | boy              | 230368 (51.4)        | 311620 (51.4)    |
| Maternal age (years)                  | <25              | 70759 (15.8)         | 98419 (16.2)     |
|                                       | 25-34            | 319477 (71.2)        | 428781 (70.7)    |
|                                       | 35+              | 58284 (13.0)         | 79677 (13.1)     |
| Parity                                | 1                | 209343 (46.7)        | 284770 (46.9)    |
|                                       | 2                | 159510 (35.6)        | 210731 (34.7)    |
|                                       | 3                | 53985 (12.0)         | 74611 (12.3)     |
|                                       | ≥4               | 87.16 (5.7)          | 36765 (6.1)      |
| Socio-economic status of municipality | low              | 284011 (63.5)        | 382548 (63.2)    |
|                                       | medium           | 79892 (17.9)         | 108134 (17.9)    |
|                                       | high             | 83154 (18.6)         | 114347 (18.9)    |
| Maternal education                    | low              | 42424 (12.9)         | 58743 (13.1)     |
|                                       | medium           | 130304 (39.6)        | 183410 (40.8)    |
|                                       | high             | 156123 (47.5)        | 207563 (46.2)    |
| National origin                       | European         | 278697 (86.8)        | 384522 (87.7)    |
|                                       | Asian            | 4840 (1.5)           | 5968 (1.4)       |
|                                       | Middle-Eastern   | 14263 (4.4)          | 18021 (4.1)      |
|                                       | African          | 21061 (6.6)          | 27391 (6.2)      |
|                                       | North-American   | 478 (0.2)            | 625 (0.1)        |
|                                       | South-American   | 1514 (0.5)           | 1942 (0.4)       |
|                                       | Australian       | 120 (0.0)            | 148 (0.0)        |
| Urbanization                          | urban/semi-urban | 341019 (76.0)        | 461673 (76.1)    |
|                                       | rural            | 107501 (24.0)        | 145204 (23.9)    |
| Month                                 | Jan              | 37867 (8.4)          | 50929 (8.4)      |
|                                       | Feb              | 34299 (7.7)          | 46524 (7.7)      |
|                                       | Mar              | 37741 (8.4)          | 51541 (8.5)      |
|                                       | Apr              | 37154 (8.3)          | 50035 (8.2)      |
|                                       | May              | 37781 (8.4)          | 50771 (8.4)      |
|                                       | Jun              | 37730 (8.4)          | 50975 (8.4)      |
|                                       | Jul              | 39355 (8.8)          | 53436 (8.8)      |
|                                       | Aug              | 39571 (8.8)          | 53366 (8.8)      |
|                                       | Sep              | 38192 (8.5)          | 51702 (8.5)      |
|                                       | Oct              | 37646 (8.4)          | 51397 (8.5)      |
|                                       | Nov              | 35010 (7.8)          | 47033 (7.8)      |
|                                       | Dec              | 36174 (8.1)          | 49168 (8.1)      |
| Day of week                           | Sunday           | 53697 (12.0)         | 56313 (9.3)      |
|                                       | Monday           | 68194 (15.2)         | 94662 (15.6)     |
|                                       | Tuesday          | 71804 (16.0)         | 104938 (17.3)    |
|                                       | Wednesday        | 68261 (15.2)         | 96664 (15.9)     |
|                                       | Thursday         | 68762 (15.3)         | 99715 (16.4)     |
|                                       | Friday           | 65440 (14.6)         | 97554 (16.1)     |
|                                       | Saturday         | 52362 (11.7)         | 57031 (9.4)      |
| National holiday                      | yes              | 10277 (2.3)          | 11124 (1.8)      |
| Influenza epidemic                    | yes              | 74416 (16.6)         | 100781 (16.6)    |
| Apparent temperature (°C)             |                  | 9.9 (-0.2-19.1)      | 9.9 (-0.2-19.1)  |
| PM <sub>10</sub> (µg/m <sup>3</sup> ) |                  | 24.5 (15.5-43.5)     | 24.5 (16.0-43.5) |
